# Supplementary material for: Adult, intensively socialized wolves show features of attachment behaviour to their handler
Source: PubMed Central journal article supplement (PMC7560749; doi:10.1038/s41598-020-74325-0), 2020-10-14
Supplement: 41598_2020_74325_MOESM2_ESM.pdf [file 41598_2020_74325_MOESM2_ESM.pdf]

**Adult, intensively socialized wolves show features of attachment behaviour to  
their handler**

Rita Lenkei<sup>1</sup>, Dóra Újváry<sup>1</sup>, Viktória Bakos<sup>1</sup> and Tamás Faragó<sup>1\*</sup>

<sup>1</sup>*Department of Ethology, Eötvös Loránd University, Budapest*

\* Correspondence to: [mustela.nivalis@gmail.com](mailto:mustela.nivalis@gmail.com)

**Supplementary Materials:**

**Supplementary Figure 1.**

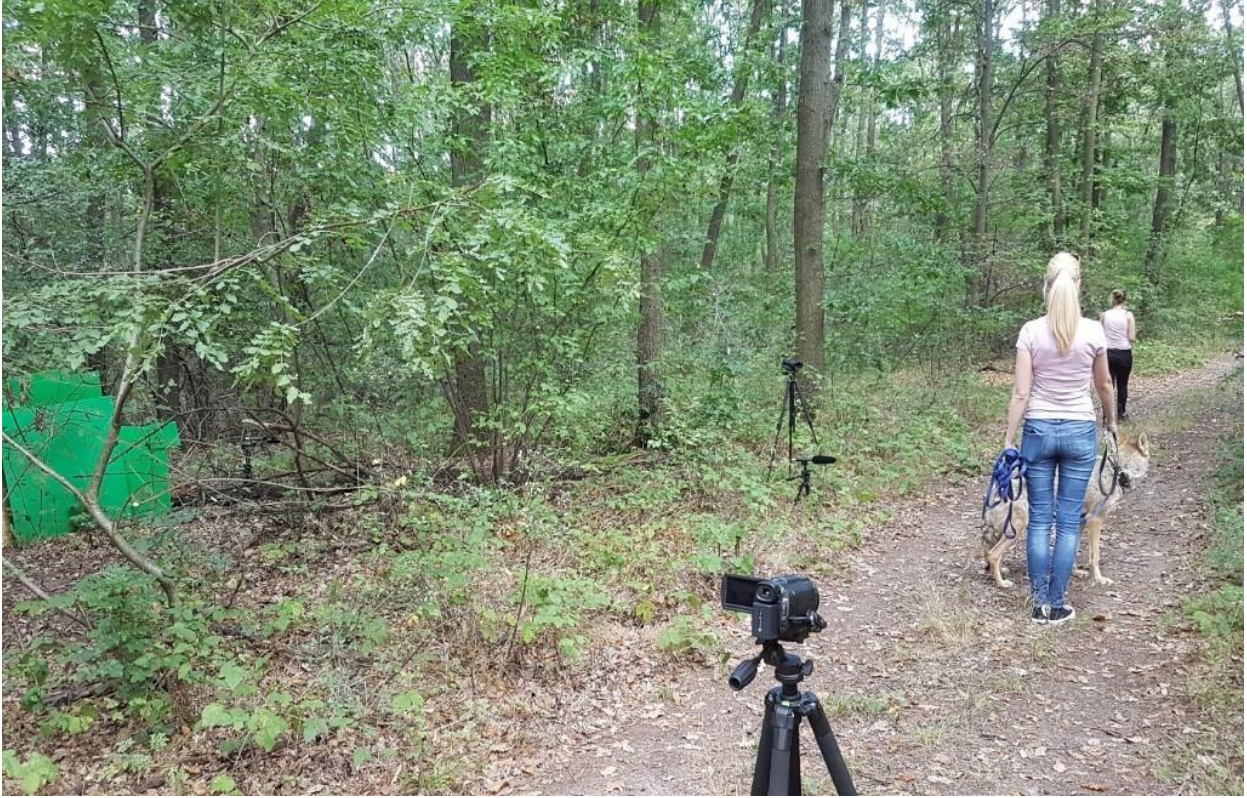

The test setup for wolves

**Supplementary Table 1.**

| <b>Name</b>     | <b>Litter ID</b> | <b>Sex</b> | <b>Reproductive status</b> | <b>Caregiver</b> | <b>Rearing</b>            | <b>Age (years)</b> | <b>Species/Breed</b>     |
|-----------------|------------------|------------|----------------------------|------------------|---------------------------|--------------------|--------------------------|
| <b>Babóca</b>   | 1                | male       | neutered                   | Other            | Hand-reared individually  | 14                 | wolf                     |
| <b>Dakota</b>   | 2                | male       | intact                     | UD               | Hand-reared individually  | 14                 | wolf                     |
| <b>Hella</b>    | 3                | female     | neutered                   | Other            | Hand-reared individually  | 1,5                | wolf                     |
| <b>Hogan</b>    | 4                | male       | neutered                   | Other            | Hand-reared with siblings | 9,5                | wolf                     |
| <b>Hupa</b>     | 3                | female     | neutered                   | Other            | Hand-reared individually  | 1,5                | wolf                     |
| <b>Nelson</b>   | 5                | male       | neutered                   | UD               | Hand-reared individually  | 9,5                | wolf (excluded)          |
| <b>Runa</b>     | 3                | female     | neutered                   | Other            | Hand-reared individually  | 1,5                | wolf                     |
| <b>Zabu</b>     | 3                | male       | neutered                   | UD               | Hand-reared individually  | 1,5                | wolf                     |
| <b>Zira</b>     | 3                | female     | neutered                   | Other            | Hand-reared individually  | 1,5                | wolf                     |
| <b>Zorba</b>    | 6                | male       | intact                     | UD               | Hand-reared with siblings | 15                 | wolf                     |
| <b>Zordon</b>   | 3                | male       | neutered                   | Other            | Hand-reared individually  | 1,5                | wolf                     |
| <b>Bella</b>    | -                | female     | intact                     | -                | -                         | 1,5                | Irish Setter             |
| <b>Cheyenne</b> | -                | female     | neutered                   | -                | -                         | 11,5               | Belgian Shepherd         |
| <b>Csoki</b>    | -                | male       | neutered                   | -                | -                         | 4,5                | Mixed                    |
| <b>Jafar</b>    | -                | male       | intact                     | -                | -                         | 3                  | White Swiss Shepherd Dog |
| <b>Kida</b>     | -                | female     | neutered                   | -                | -                         | 5,5                | Boxer                    |
| <b>Leila</b>    | -                | female     | neutered                   | -                | -                         | 3                  | Golden Retriever         |
| <b>Lenke</b>    | -                | female     | intact                     | -                | -                         | 5,5                | Bichon Havanese          |
| <b>Luca</b>     | -                | female     | neutered                   | -                | -                         | 9                  | Mixed                    |
| <b>Molly</b>    | -                | female     | neutered                   | -                | -                         | 2,5                | Wirehaired Dachshund     |

Basic information of the subjects

**Supplementary Table 2.**

| Phase   | Name      | Time          | Description                                                                                                                                 | Start - End                                                                                                                                                                                                  |
|---------|-----------|---------------|---------------------------------------------------------------------------------------------------------------------------------------------|--------------------------------------------------------------------------------------------------------------------------------------------------------------------------------------------------------------|
| Phase 1 | Baseline  | 30 s          | The H and the U stood beside each other without interacting with the subjects meanwhile the one who stayed with the subject held the leash. | The H/U set the stopwatch – After the 30 sec. elapsed                                                                                                                                                        |
| Phase 2 | Leaving   | approx. 40 s  | The H/U said goodbye to the subject and walked away disappearing from the sight.                                                            | The last physical contact with the subject after saying good-bye – When the hiding person disappeared (indicated by the staying person)                                                                      |
| Phase 3 | Absence   | approx. 140 s | The H/U was out of sight.                                                                                                                   | When the hiding person disappeared (indicated by the staying person) –When the hiding person reappeared (indicated by the staying person)                                                                    |
| Phase 4 | Returning | approx. 40 s  | After the 3 minutes elapsed she reappeared and walked back.                                                                                 | When the hiding person reappeared (indicated by the staying person) - The first physical contact with the subject (if the subject showed avoidance then the moment when the H/U were the closest to him/her) |
| Phase 5 | Greeting  | 10 s          | The H/U greeted and petted the subject.                                                                                                     | The first physical contact with the subject (if the subject showed avoidance then the moment when the H/U were the closest to him/her) – After the 10 sec. elapsed                                           |

The description of the test phases. In the analysis Leaving and Alone phases were merged to form Separation phase.

**Supplementary Table 3.**

| <b>Category</b>    | <b>Name</b>    | <b>Type</b> | <b>Definition</b>                                                                                                                 |
|--------------------|----------------|-------------|-----------------------------------------------------------------------------------------------------------------------------------|
| Position           | Move           | Duration    | The wolf/dog moved (at least two legs was moved)                                                                                  |
|                    | Stand          | Duration    | The wolf/dog was standing (4 paws were on the ground)                                                                             |
|                    | Lie            | Duration    | The wolf/dog was lying                                                                                                            |
|                    | Sit            | Duration    | The wolf/dog was sitting                                                                                                          |
| Vocalisation       | Whine          | Duration    | The wolf/dog made a high-pitched vocalization                                                                                     |
|                    | Pant           | Duration    | A repeated noise made by the wolf/dog, which sounds like loud and fast breath taking                                              |
|                    | Growl          | Duration    | The wolf/dog made a low-pitched noisy vocalization                                                                                |
|                    | Other          | Duration    | The wolf/dog made other types of vocalizations which were not in the other categories                                             |
| Object exploration |                | Duration    | The wolf/dog was sniffing the ground or any other object around                                                                   |
|                    | Sniffing       | Duration    | The wolf/dog was sniffing the air (head held up, movement of the nose was visible)                                                |
| Orientation        | Staying person | Duration    | The wolf's/dog's head was turned towards the staying person, excluding sniffing and exploration                                   |
|                    | Leaving person | Duration    | The wolf's/dog's head was turned towards the leaving person or towards the way where she left, excluding sniffing and exploration |
| Physical contact   | Staying person | Duration    | The wolf was in physical contact with the U (only coded if the wolf initiated it)                                                 |
|                    | Leaving person | Duration    | The wolf was in physical contact with the H (only coded if the wolf initiated it)                                                 |
| Leash pull         | Towards        | Frequency   | The wolf/dog pulled the leash once towards the leaving person                                                                     |
|                    | Other          | Frequency   | The wolf/dog pulled the leash once towards any other direction                                                                    |
| Leash tension      | Towards        | Duration    | The leash was tense towards the leaving person, excluding sniffing and exploration                                                |
|                    | Other          | Duration    | The leash was tense towards any other direction, excluding sniffing and exploration                                               |
| Leash chew         |                | Duration    | The wolf/dog chewed the leash (it was in his/her mouth)                                                                           |
| Mouth lick         |                | Frequency   | The wolf/dog licked his/her mouth (the tongue was visible)                                                                        |

The coded behaviour responses

**Supplementary Table 4.**

| <b>Behaviour</b> |                   | <b>B</b>   | <b>SD</b> | <b>df</b> | <b>t/z</b> | <b>p</b> |
|------------------|-------------------|------------|-----------|-----------|------------|----------|
| Stress           | leaving p         | -0.4102734 | 0.4144234 | 17        | -0.989986  | 0.3361   |
|                  | species           | 0.4195540  | 0.5520456 | 17        | 0.759999   | 0.4577   |
|                  | leaving p:species | -0.1137507 | 0.5712432 | 17        | -0.199128  | 0.8445   |
| Exploration      | leaving p         | -0.992519  | 0.8603247 | 16        | -1.153656  | 0.2656   |
|                  | species           | 0.288162   | 0.9741752 | 17        | 0.295801   | 0.7710   |
|                  | leaving p:species | 1.614836   | 1.2053617 | 16        | 1.339710   | 0.1991   |
| Escape           | leaving p         | -0.3246345 | 0.5013925 | 9         | -0.647466  | 0.5335   |
| Interaction      | leaving p         | 0.04652    | 0.30508   |           | 0.152      | 0.879    |
|                  | species           | -0.20673   | 0.55791   |           | -0.371     | 0.711    |
|                  | leaving p:species | 0.01410    | 0.46303   |           | 0.030      | 0.976    |
| Lip lick fr.     | leaving p         | 0.2877     | 0.7638    |           | 0.377      | 0.7064   |
|                  | species           | 1.9095     | 0.6236    |           | 3.062      | 0.0022   |
|                  | leaving p:species | -1.0986    | 0.8660    |           | -1.269     | 0.2046   |

Comparison of the baseline phases between the trials

### **Supplementary Data (separate file)**

All raw behaviour data of the dogs and wolves and the calculated scores used in the analysis.
